# Supplementary material
Source: Research Square preprint supplement (doi:10.21203/rs.3.rs-8725368/v1)
Supplement: Supplementary file 1 [file 454777aa5b6bbfb28c286589.docx]

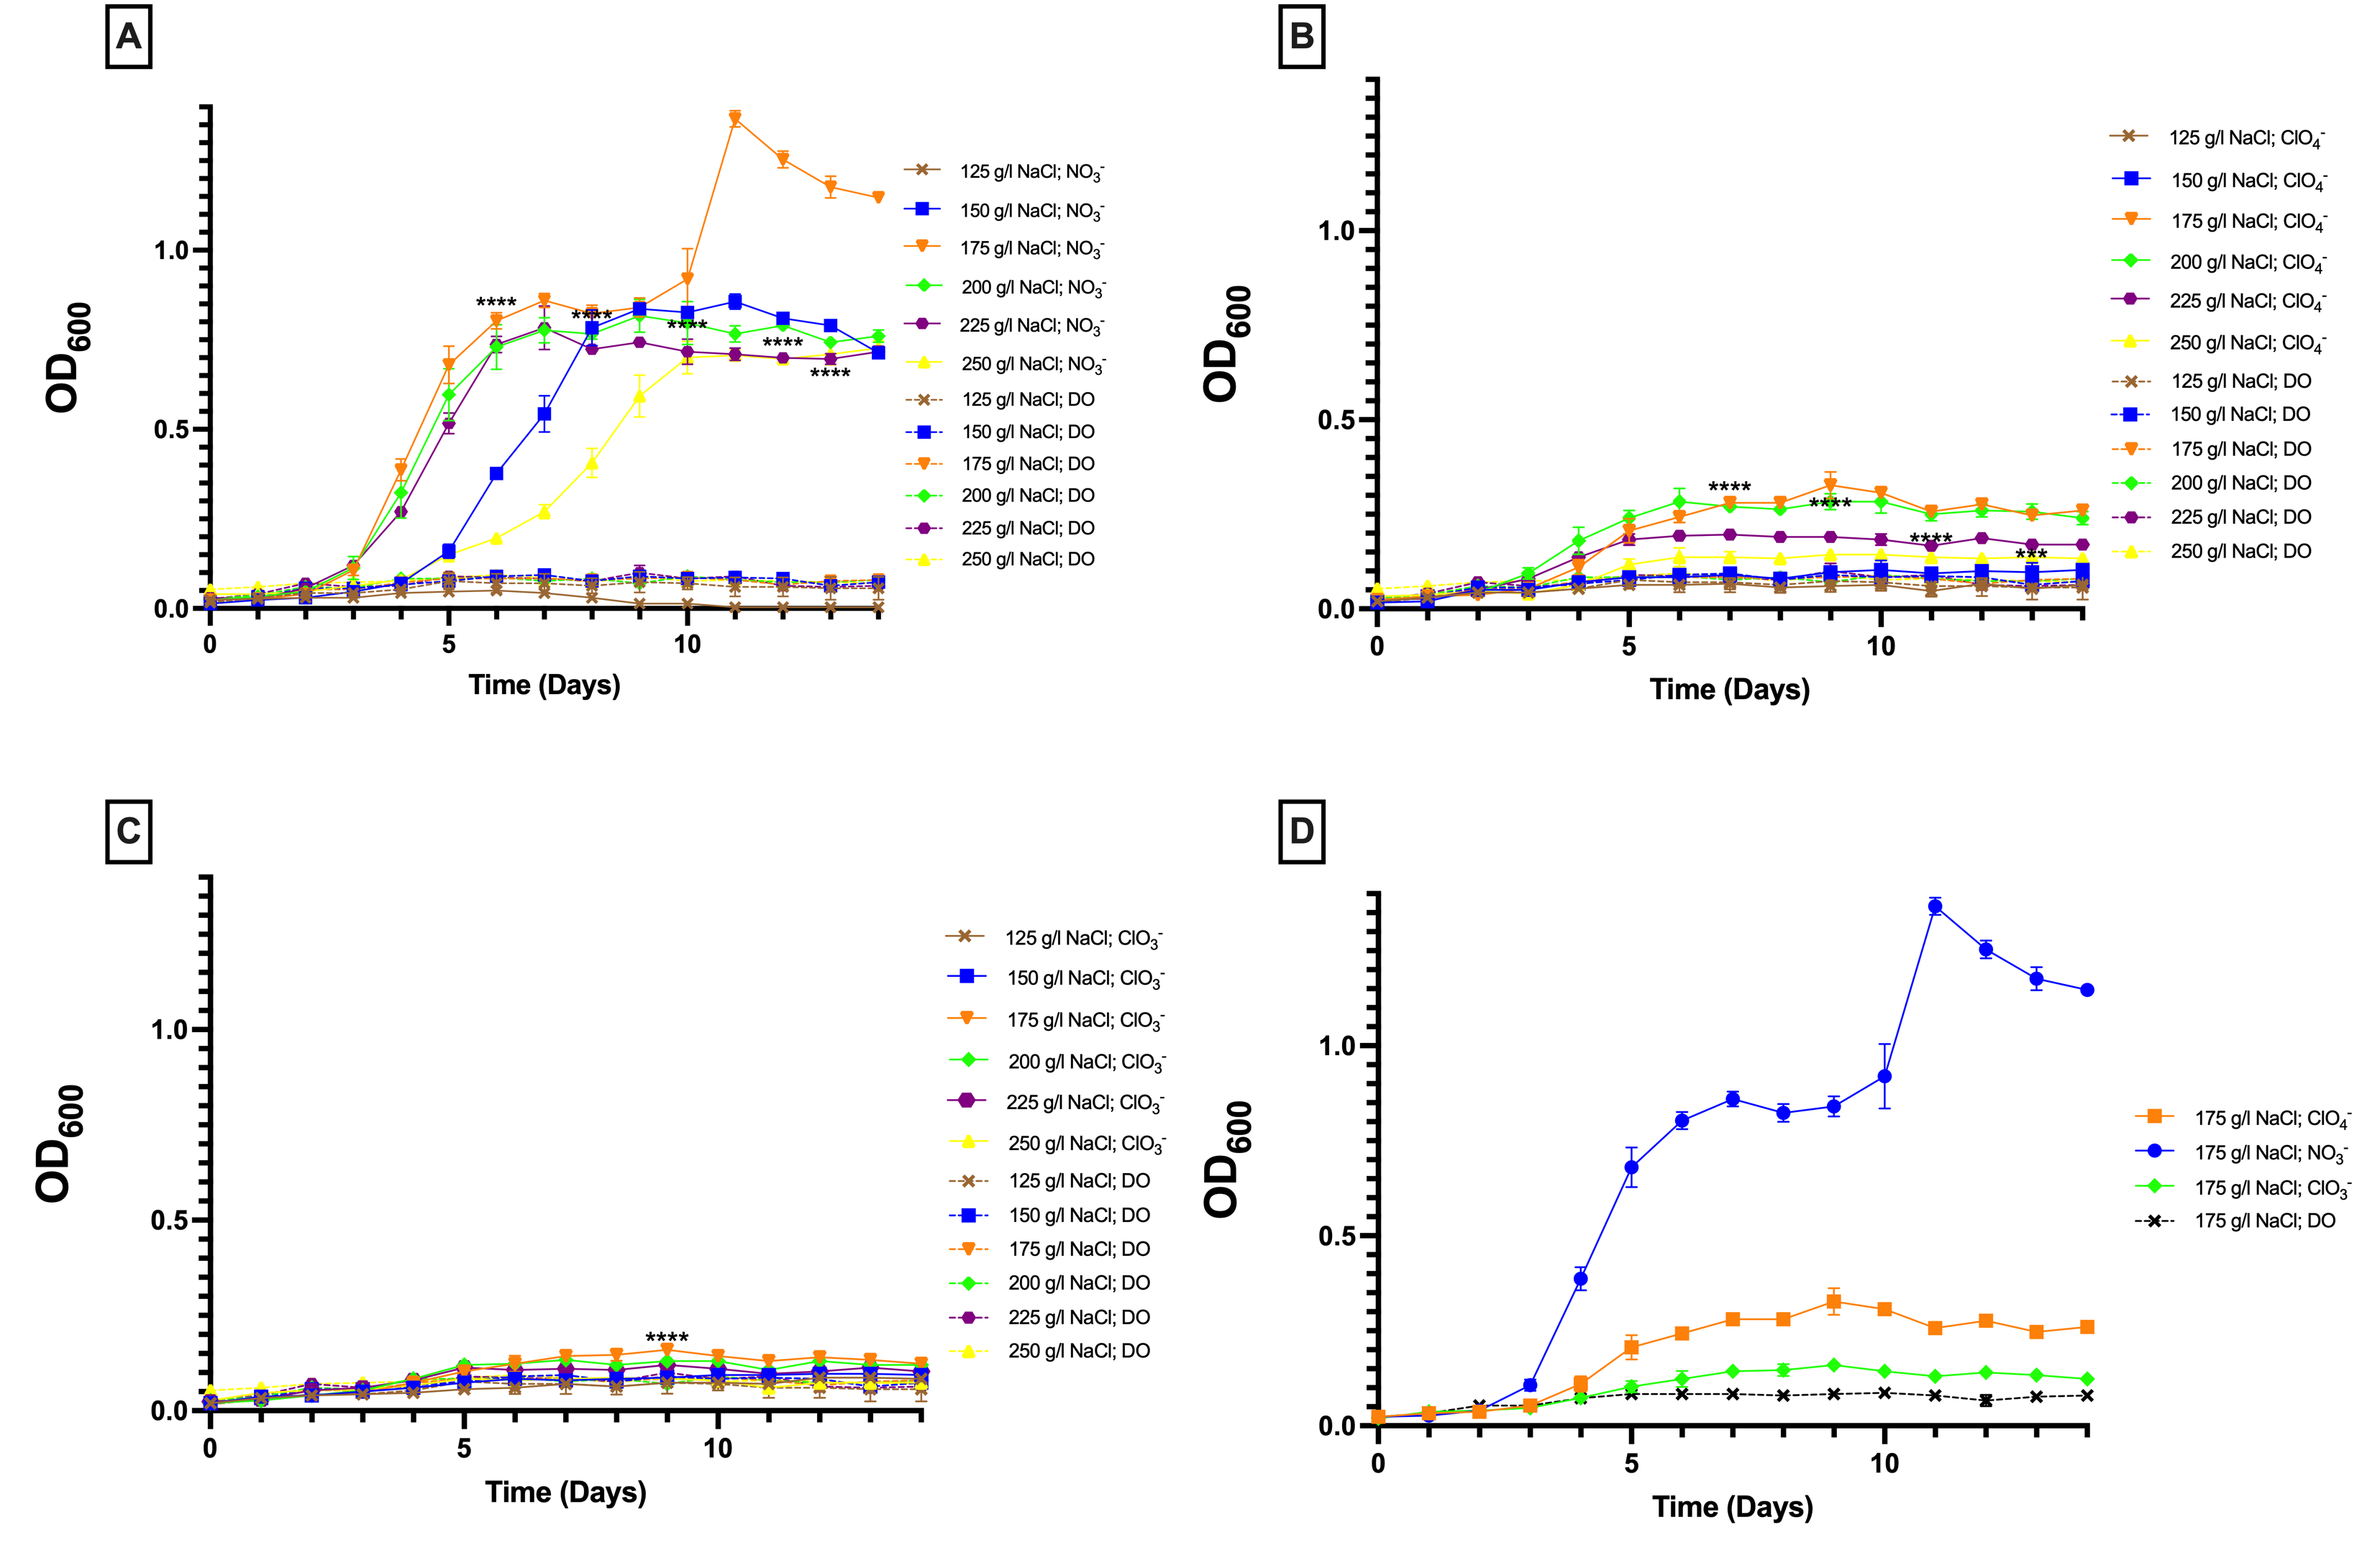


*Supplementary figure 1: Optical density (OD600) measurements of cultures incubated over 14 days in the NaCl gradient experiment (125 – 250 g l-1). Solid lines indicate OD600 values for the respective alternative electron acceptor (20 mM) and dashed lines indicate negative controls for each NaCl treatment with change in OD600 solely from growth on dissolved oxygen.* ***A****) Anoxic conditions with nitrate as an alternative electron acceptor.* ***B****) Anoxic conditions with perchlorate as an alternative electron acceptor.* ***C)*** *Anoxic conditions with chlorate as an alternative electron acceptor.* ***D****) Comparison of anaerobic growth on all three alternative electron acceptors at 175 g l-1 NaCl, the NaCl concentration where anaerobic growth on perchlorate is induced.* *Asterisks indicate statistical significance,* *** p < 0.001, **** p < 0.0001.


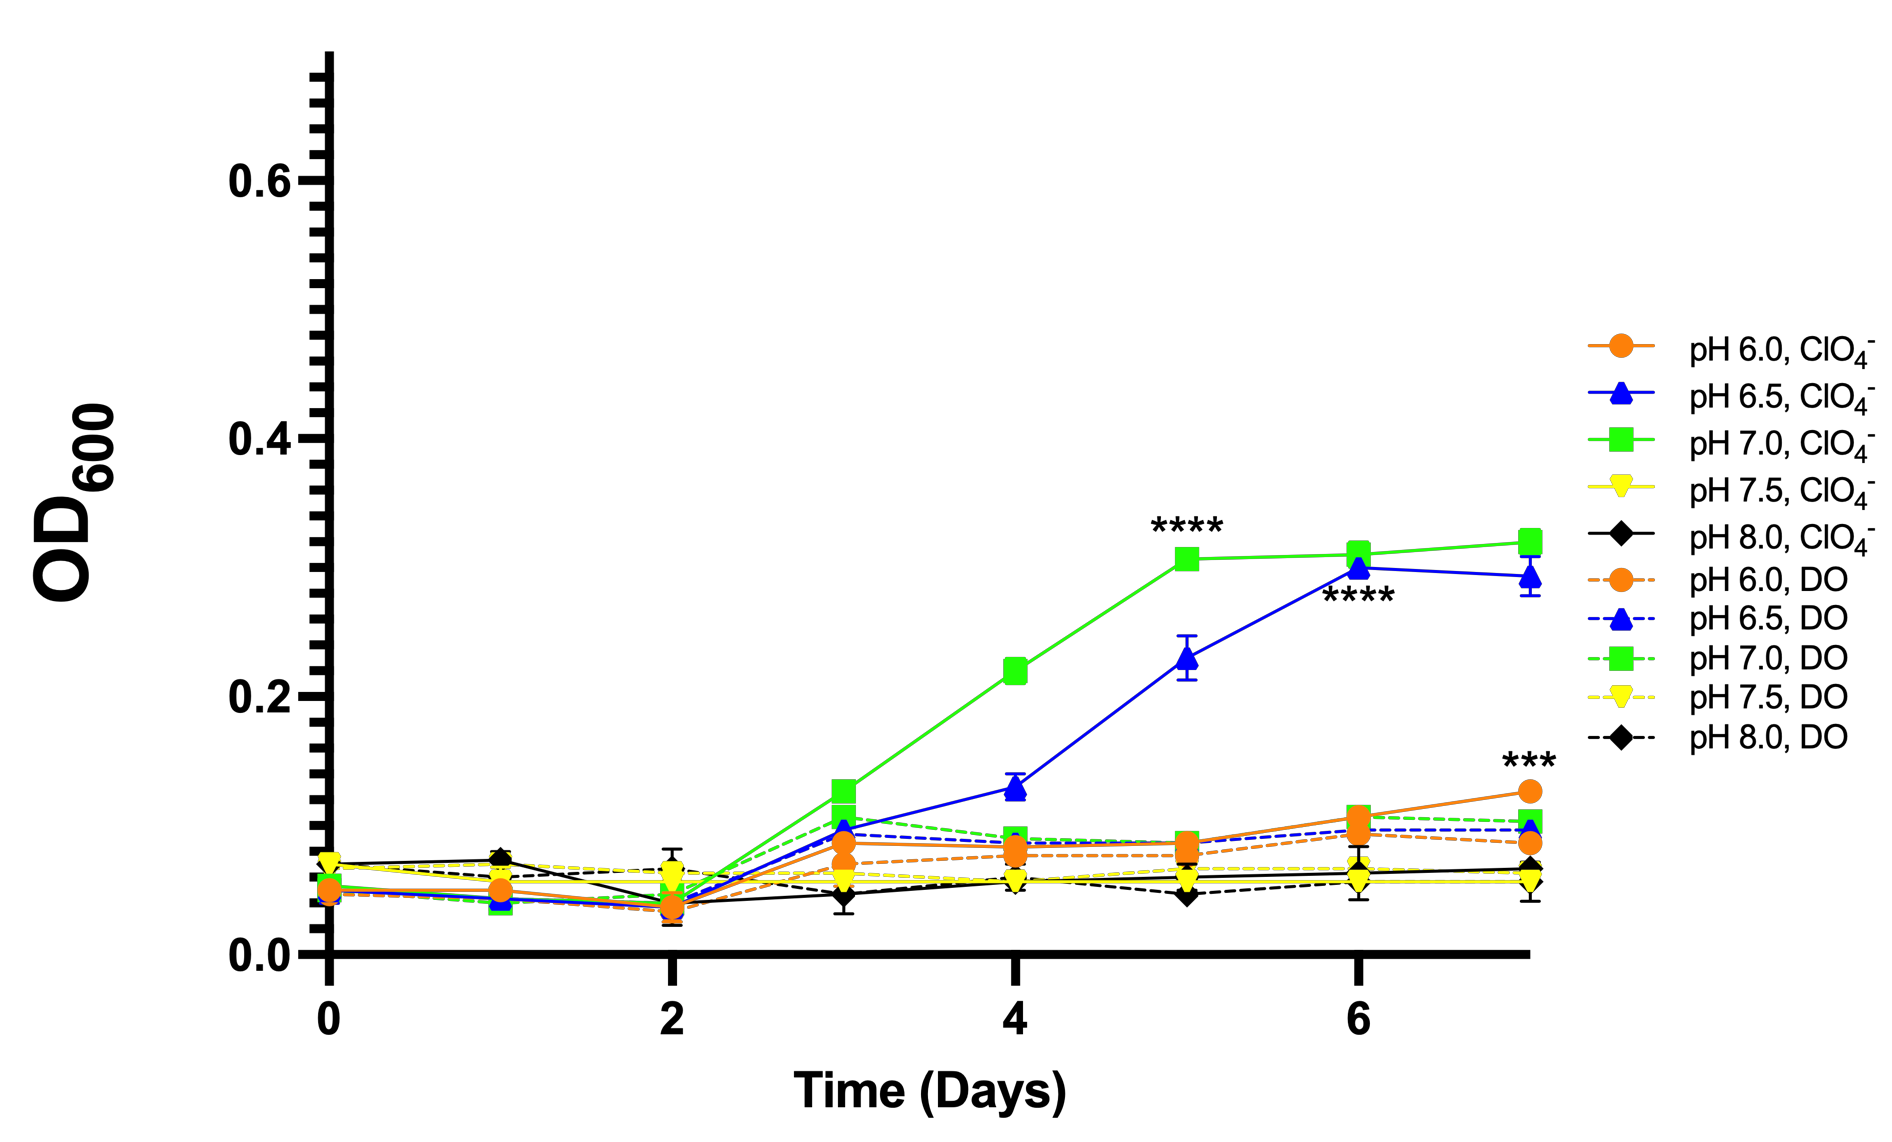


*Supplementary figure 2: Optical density (OD600) measurements of cultures incubated over 7 days in the pH gradient experiment (pH 6.0 – 8.0). Solid lines indicate OD600 values for anaerobic perchlorate-containing (20 mM) cultures, and dashed lines indicate negative controls for each pH treatment, with a change in OD600 solely from growth on dissolved oxygen. Asterisks indicate statistical significance,*** p < 0.001, **** p < 0.0001.*


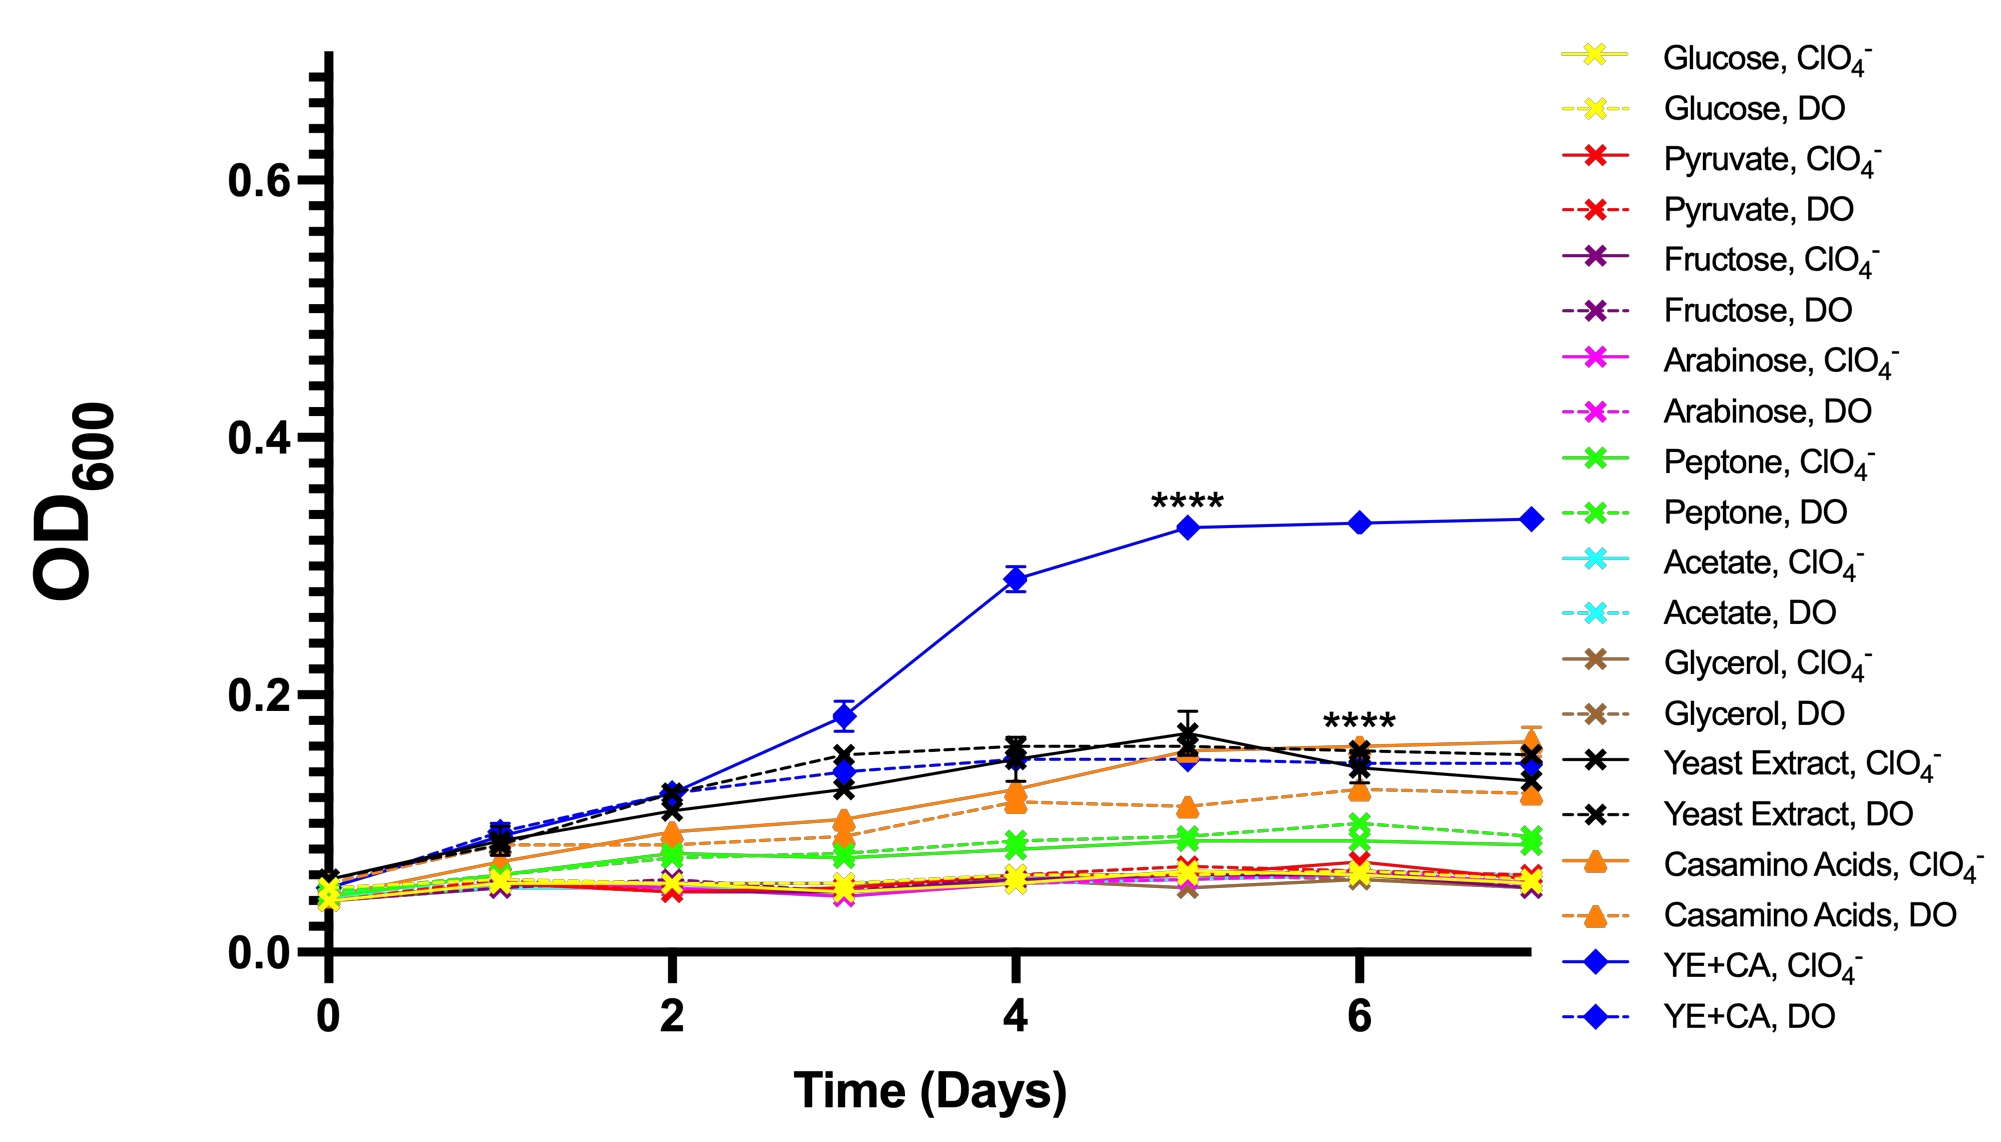


*Supplementary figure 3: Optical density (OD600) measurements of cultures incubated over 7 days in the carbon sources experiment (5 g l-1). Solid lines indicate OD600 values for anaerobic perchlorate containing (20 mM) cultures and dashed lines indicate negative controls for each carbon source treatment with change in OD600 solely from growth on dissolved oxygen.* *Asterisks indicate statistical significance*, ***** p < 0.0001.*
